# Supplementary material
Source: ML conference proceedings conference paper supplement (https://openreview.net/forum?id=cAhJF87GN0)
Supplement: supplementary_material [file attachment]

## Sheet: Sheet1
	L_G_and_S_frontomargin_thickness	lh_G_and_S_occipital_inf_thickness	lh_G_and_S_paracentral_thickness	lh_G_and_S_subcentral_thickness	lh_G_and_S_transv_frontopol_thickness	lh_G_and_S_cingul-Ant_thickness	lh_G_and_S_cingul-Mid-Ant_thickness	lh_G_and_S_cingul-Mid-Post_thickness	lh_G_cingul-Post-dorsal_thickness	lh_G_cingul-Post-ventral_thickness	lh_G_cuneus_thickness	lh_G_front_inf-Opercular_thickness	lh_G_front_inf-Orbital_thickness	lh_G_front_inf-Triangul_thickness	lh_G_front_middle_thickness	lh_G_front_sup_thickness	lh_G_Ins_lg_and_S_cent_ins_thickness	lh_G_insular_short_thickness	lh_G_occipital_middle_thickness	lh_G_occipital_sup_thickness	lh_G_oc-temp_lat-fusifor_thickness	lh_G_oc-temp_med-Lingual_thickness	lh_G_oc-temp_med-Parahip_thickness	lh_G_orbital_thickness	lh_G_pariet_inf-Angular_thickness	lh_G_pariet_inf-Supramar_thickness	lh_G_parietal_sup_thickness	lh_G_postcentral_thickness	lh_G_precentral_thickness	lh_G_precuneus_thickness	lh_G_rectus_thickness	lh_G_subcallosal_thickness	lh_G_temp_sup-G_T_transv_thickness	lh_G_temp_sup-Lateral_thickness	lh_G_temp_sup-Plan_polar_thickness	lh_G_temp_sup-Plan_tempo_thickness	lh_G_temporal_inf_thickness	lh_G_temporal_middle_thickness	lh_Lat_Fis-ant-Horizont_thickness	lh_Lat_Fis-ant-Vertical_thickness	lh_Lat_Fis-post_thickness	lh_Pole_occipital_thickness	lh_Pole_temporal_thickness	lh_S_calcarine_thickness	lh_S_central_thickness	lh_S_cingul-Marginalis_thickness	lh_S_circular_insula_ant_thickness	lh_S_circular_insula_inf_thickness	lh_S_circular_insula_sup_thickness
0	2.075	2.075	2.044	2.171	2.218	2.425	2.281	2.213	2.561	2.016	1.43	2.236	2.548	2.32	2.32	2.484	3.135	3.263	1.981	1.532	2.209	1.618	2.62	2.501	2.088	2.178	1.837	1.761	2.319	2.112	2.713	1.842	1.873	2.424	2.681	2.077	2.539	2.477	1.914	2.066	1.846	1.664	2.927	1.384	1.486	1.9	2.492	1.937	2.178
1	2.163	2.143	2.424	2.505	2.427	2.34	2.378	2.452	2.647	2.123	1.78	2.748	2.148	2.532	2.382	2.625	2.881	3.521	2.197	1.913	2.422	1.867	2.725	2.517	2.282	2.47	2.099	2.131	2.721	2.243	2.523	2.492	2.514	2.826	2.882	2.34	2.439	2.528	2.031	2.11	2.111	1.818	3.073	1.602	1.963	2.047	2.342	2.403	2.296
2	2.47	2.211	2.546	2.564	2.715	2.691	2.973	2.405	2.761	1.788	1.795	2.854	2.59	2.713	2.69	2.862	3.428	3.149	2.502	2.11	2.882	1.917	2.687	2.778	2.629	2.594	2.319	2.301	2.864	2.516	2.333	2.226	2.511	2.816	2.758	2.508	2.943	2.994	2.007	2.415	2.152	1.936	2.653	1.837	2.027	2.346	2.88	2.742	2.646
3	2.15	1.838	2.166	2.299	2.447	2.363	2.417	2.072	2.254	1.78	1.515	2.253	2.189	2.049	2.224	2.402	2.866	2.768	2.071	1.65	2.162	1.734	1.886	2.354	1.971	2.2	2.051	1.737	2.211	2.028	2.247	1.561	2.227	2.156	2.602	1.959	2.074	2.267	1.979	2.146	1.89	1.54	1.889	1.601	1.653	1.94	2.476	2.105	2.299
4	2.548	2.442	2.152	2.53	2.41	2.606	2.71	2.593	3.018	1.909	1.757	2.815	3.363	2.775	2.697	2.818	3.528	3.722	2.496	2.08	2.975	1.824	2.513	2.852	2.527	2.458	2.287	2.178	2.977	2.362	2.608	1.946	2.579	2.967	3.525	2.442	2.856	2.977	2.915	2.334	2.304	2.234	3.341	1.843	1.916	2.197	2.607	2.563	2.419
5	2.291	1.502	2.032	2.301	2.293	2.577	2.419	2.309	2.666	2.427	1.378	2.524	2.533	2.64	2.367	2.613	3.36	3.433	1.944	1.466	1.993	1.695	3.022	2.564	2.13	2.269	2.079	2.063	2.503	2.092	2.326	2.41	2.035	2.616	2.746	2.053	2.564	2.552	2.099	2.652	2.044	1.581	3.272	1.59	1.826	2.092	2.412	2.745	2.348
6	2.374	2.261	2.174	2.507	2.395	2.571	2.598	2.4	3.04	2.298	1.872	2.226	1.864	2.007	2.407	2.511	3.322	3.166	2.091	1.766	3.012	1.962	2.857	2.482	2.478	2.6	2.111	1.914	2.275	2.309	2.679	1.927	2.446	2.781	2.424	2.595	2.535	2.937	1.76	2.623	2.145	2.119	2.489	1.702	1.751	2.293	2.184	2.26	2.067
7	2.23	2.069	1.995	2.549	2.624	2.724	2.679	2.323	2.777	1.805	1.741	2.56	2.038	2.586	2.408	2.757	3.096	3.839	2.457	2.188	2.443	1.674	2.947	2.241	2.475	2.416	2.229	2.254	2.54	2.301	2.569	2.216	2.355	2.967	3.303	2.413	2.776	2.887	1.92	2.354	2.108	1.772	3.357	1.514	1.739	1.979	2.389	2.398	2.307
8	2.141	1.932	2.271	2.63	2.37	2.576	2.493	2.396	2.147	1.446	1.64	2.526	2.503	2.388	2.42	2.575	2.71	3.093	2.133	1.982	2.277	1.674	2.634	2.527	2.162	2.38	2	2.217	2.785	2.09	2.577	1.915	2.685	2.925	3.132	2.527	2.364	2.497	2.135	2.257	2.084	1.668	3.064	1.581	1.907	1.857	2.5	2.508	2.214
9	2.181	2.435	2.475	2.591	2.549	2.362	2.478	2.47	2.758	2.1	1.599	2.668	2.545	2.46	2.603	2.82	2.918	3.353	2.716	2.151	2.895	1.976	3.112	2.361	2.877	2.61	2.723	2.239	2.902	2.673	2.284	2.08	2.545	3.092	3.236	2.774	2.844	2.846	1.873	1.948	2.327	2.116	3.425	1.918	1.947	2.167	2.623	2.688	2.561
200	2.181	2.094	1.999	2.301	2.082	2.632	2.42	2.324	2.913	1.668	1.734	2.59	2.763	2.431	2.407	2.674	2.76	3.321	2.57	1.807	2.509	1.881	2.698	2.447	2.291	2.45	2.182	2.052	2.62	2.301	2.59	1.775	2.331	2.752	3.161	2.109	2.756	2.804	1.991	2.411	1.915	1.801	3.443	1.515	1.723	1.867	2.347	2.391	2.196
201	2.525	2.299	2.184	2.688	2.521	2.648	2.625	2.602	3.086	2.284	1.714	2.565	2.591	2.64	2.605	2.713	3.304	3.761	2.449	1.976	2.795	1.888	2.979	2.583	2.421	2.63	2.283	2.084	2.94	2.298	2.552	3.198	2.256	2.797	3.189	2.57	2.889	2.93	2.023	2.193	2.132	1.85	3.083	1.695	1.85	2.092	2.774	2.657	2.385
202	2.212	2.164	2.327	2.557	2.277	2.715	2.501	2.372	2.813	2.342	1.624	2.643	2.846	2.535	2.492	2.658	3.073	3.466	2.354	2.016	2.616	1.759	2.817	2.639	2.388	2.584	2.336	2.095	2.712	2.33	2.376	2.84	2.071	2.7	3.038	2.387	2.77	2.673	2.44	2.27	2.265	1.814	3.158	1.796	1.886	2.298	2.326	2.32	2.36
203	2.435	2.426	2.401	2.782	2.684	2.642	2.712	2.538	2.928	2.696	1.626	2.684	2.529	2.786	2.709	2.825	3.488	4.006	2.357	2.041	2.769	1.859	3.227	2.818	2.625	2.648	2.458	2.204	2.857	2.45	2.271	3.483	2.4	3.154	3.696	2.542	3.011	3.01	2.532	2.682	2.572	1.93	3.233	1.699	1.897	2.263	2.443	2.628	2.609
204	2.372	2.1	2.067	2.6	3.013	2.741	2.245	2.377	2.994	1.399	1.632	2.511	3.26	2.381	2.485	2.71	3.218	3.924	2.37	1.783	2.729	1.75	2.402	3.348	2.514	2.431	2.282	1.846	2.012	2.266	3.071	1.547	2.068	2.991	2.922	2.402	2.963	2.839	2.209	2.384	2.307	1.727	3.159	1.583	1.451	2.055	2.773	2.385	2.496
205	2.472	2.118	2.001	2.514	2.072	2.249	2.247	2.197	2.538	2.403	1.508	2.395	2.51	2.294	2.329	2.437	2.847	3.241	2.49	1.791	2.665	1.654	2.769	2.637	2.249	2.36	1.972	1.846	2.24	2.063	2.112	2.113	2.017	2.868	3.297	2.234	2.502	2.877	1.763	1.844	2.274	1.761	2.715	1.571	1.684	1.942	2.475	2.443	2.282
206	2.326	1.966	1.98	2.259	2.489	2.31	2.026	2.21	2.571	1.398	1.678	2.302	2.472	2.212	2.227	2.341	2.963	3.238	2.409	2.124	2.325	1.737	2.666	2.158	2.416	2.491	2.066	1.848	2.396	2.014	2.28	2.077	2.003	2.614	2.805	2.273	2.734	2.842	1.736	1.989	2.031	1.735	2.743	1.665	1.648	1.88	2.456	2.024	2.033
207	2.229	2.563	2.239	2.536	2.316	2.329	2.308	2.325	2.51	2.11	1.797	2.453	2.626	2.367	2.314	2.527	3.187	3.141	2.654	2.128	2.784	1.903	3.131	2.549	2.463	2.453	2.391	2.021	2.669	2.487	2.228	1.79	2.264	2.987	3.545	2.211	2.849	2.875	2.045	2.193	2.07	1.991	3.208	1.761	1.784	1.968	2.528	2.263	2.261
208	2.265	2.036	1.779	2.396	2.22	2.229	2.463	2.384	2.475	1.301	1.601	2.511	2.487	2.418	2.466	2.434	3.113	3.535	2.378	2.099	2.543	1.807	3.288	2.601	2.202	2.46	2.159	1.896	2.408	2.09	2.436	1.676	2.079	2.688	3.196	2.178	2.913	2.998	2.245	2.045	1.995	1.876	3.37	1.506	1.821	1.847	2.326	2.345	2.108
209	2.073	2.297	2.123	2.534	2.59	2.536	2.511	2.393	2.777	1.945	1.701	2.653	2.506	2.401	2.345	2.74	3.257	3.642	2.392	2.05	2.833	1.928	2.895	2.528	2.609	2.562	2.332	2.052	2.879	2.487	2.305	2.149	2.613	2.878	3.182	2.47	2.744	2.718	1.882	2.096	2.478	1.695	2.986	1.694	1.919	1.993	2.452	2.65	2.372
[truncated: 100 more columns]
